RESEARCH ARTICLE

# The acute impact of high-dose lipid-lowering treatment on endothelial progenitor cells in patients with coronary artery disease—The REMEDY-EPC early substudy

Rosalinda Madonna<sup>1,2</sup>, Francesca Vera Renna<sup>1</sup>, Paola Lanuti<sup>2</sup>, Matteo Perfetti<sup>2</sup>, Marco Marchisio<sup>3,4</sup>, Carlo Briguori<sup>5</sup>, Gerolama Condorelli<sup>6</sup>, Lamberto Manzoli<sup>7,8,9</sup>, Raffaele De Caterina<sup>1,2\*</sup>

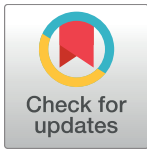

**1** Center of Aging Sciences and Translational Medicine – CESI-MeT, “G. d’Annunzio” University, Chieti, Italy, **2** Institute of Cardiology, Department of Neurosciences, Imaging, and Clinical Sciences, “G. d’Annunzio” University, Chieti, Italy, **3** Center of Aging Sciences and Translational Medicine – CESI-MeT, Chieti, Italy, **4** Department of Medicine and Aging Sciences, “G. d’Annunzio” University, Chieti, Italy, **5** Clinica Mediterranea, Naples, Italy, **6** Department of Molecular Medicine and Medical Biotechnologies “Federico II” University, Naples, Italy, **7** Center of Aging Sciences and Translational Medicine – CESI-MeT, Chieti, Italy, **8** Department of Medicine and Aging Sciences, “G. d’Annunzio” University, Chieti, Italy, **9** Department of Medical Sciences, University of Ferrara, Ferrara, Italy; Regional Healthcare Agency of Abruzzo, Pescara, Italy

\* [rdecater@unich.it](mailto:rdecater@unich.it)

OPEN ACCESS

**Citation:** Madonna R, Renna FV, Lanuti P, Perfetti M, Marchisio M, Briguori C, et al. (2017) The acute impact of high-dose lipid-lowering treatment on endothelial progenitor cells in patients with coronary artery disease—The REMEDY-EPC early substudy. PLoS ONE 12(4): e0172800. <https://doi.org/10.1371/journal.pone.0172800>

**Editor:** Alberico Catapano, Università degli Studi di Milano, ITALY

**Received:** November 21, 2016

**Accepted:** February 9, 2017

**Published:** April 10, 2017

**Copyright:** © 2017 Madonna et al. This is an open access article distributed under the terms of the [Creative Commons Attribution License](https://creativecommons.org/licenses/by/4.0/), which permits unrestricted use, distribution, and reproduction in any medium, provided the original author and source are credited.

**Data Availability Statement:** All relevant data is contained within the paper.

**Funding:** This study was supported by grants from the Italian Istituto Nazionale Ricerche Cardiovascolari (I.N.R.C.), the Italian Ministry of the University and Research (PRIN projects), and the CARIPLO Foundation (to R.D.C.). The REMEDY Study, including the provision of drug treatments here compared, was initially supported by a grant from AstraZeneca Italy. The funders had no role in

## Abstract

### Rationale and objective

Endothelial progenitor cells (EPCs) play a role in vascular repair, while circulating endothelial cells (CECs) are biomarkers of vascular damage and regeneration. Statins may promote EPC/CEC mobilization in the peripheral blood. We evaluated whether pre-procedural exposure to different lipid-lowering drugs (statins±ezetimibe) can acutely increase levels/activity of EPCs/CECs in patients with stable coronary artery disease (CAD).

### Methods

In a planned sub-analysis of the *Rosuvastatin For REduction Of Myocardial DamagE During Coronary AngioplastY (REMEDY)* trial, 38 patients with stable CAD on chronic low-dose statin therapy were randomized, in a double-blind, placebo-controlled design, into 4 groups before PCI: *i.* placebo (n = 11); *ii.* atorvastatin (80 mg+40 mg, n = 9); *iii.* rosuvastatin (40 mg twice, n = 9); and *iv.* rosuvastatin (5 mg) and ezetimibe (10 mg) twice, (n = 9). At baseline and 24 h after treatment—before PCI—, patients underwent blinded analyses of EPCs [colony forming units-endothelial cells (CFU-ECs), endothelial colony-forming cells (ECFCs) and tubulization activity] and CECs in peripheral blood.

### Results

We found no significant treatment effects on parameters investigated such as number of CECs [Median (IQR): *i.* 0(0), *ii.* 4.5(27), *iii.* 1.9(2.3), *iv.* 1.9(2.3)], CFU-ECs [Median (IQR):

study design, data collection and analysis, decision to publish, or preparation of the manuscript.

**Competing interests:** The authors have declared that no competing interests exist.

*i.* 27(11), *ii.* 19(31), *iii.* 47(36), *iv.* 30(98)], and ECFCs [Median (IQR): *i.* 86(84), *ii.* 7(84), *iii.* 8/(42.5), *iv.* 5(2)], as well as tubulization activity [total tubuli (well), Median (IQR): *i.* 19(7), *ii.* 5(4), *iii.* 25(13), *iv.* 15(24)].

## Conclusions

In this study, we found no evidence of acute changes in levels or activity of EPCs and CECs after high-dose lipid-lowering therapy in stable CAD patients.

## Introduction

Stem/progenitor cell transplantation or mobilization are emerging as promising new treatments for heart failure and myocardial infarction [1]. Endothelial progenitor cells (EPCs) are rare progenitor cell subsets originated in the bone marrow, which are mobilized upon specific stimulation [2–4], then homing to target tissues where they are involved in endothelial repair or remodeling, as well as in post-natal neo-vasculogenesis [5]. EPCs may contribute to cardiac and vascular repair [6–8]. EPCs also appear to promote cardioprotection and cytoprotection by releasing paracrine factors, such as vascular endothelial growth factor (VEGF), granulocyte-colony stimulating factor (G-CSF), stem cell-derived factor (SDF)-1 $\alpha$  and insulin growth factor (IGF)-1 [9, 10].

Among their so called “pleiotropic effects”, independent of low-density lipoprotein (LDL) reduction, statins have been shown to efficiently increase levels of EPCs in patients with coronary artery disease (CAD) [11] and in patients with chronic heart failure [12], and to improve the proliferative capacity of EPCs, in a way similar to VEGF [11, 13, 14]. Such effects have been ascribed to the regulation of stem/EPC gene expression and function [15, 16]. Treatment with statins may also inhibit stem cell apoptosis and increase their proliferation [17]. Statins inhibit 3-hydroxy-3-methylglutaryl coenzyme A (HMG-CoA) reductase, a rate-limiting enzyme catalyzing the conversion of HMG-CoA to mevalonic acid. In addition to improving lipid profile by reducing LDL cholesterol levels, statins reduce the incidence of myocardial infarction after percutaneous coronary intervention (PCI) [18, 19]. In the randomized ARMYDA (Atorvastatin for Reduction of MYocardial Damage during Angioplasty) RECAPTURE trial, reloading with high-dose atorvastatin has been reported to improve clinical outcomes of patients on chronic statin therapy undergoing PCI [20]. Other described acute effects of statins in the setting of PCI [21] include the modulation on endothelial function, inflammation and thrombosis, with mechanisms not completely understood [22]. One hypothesis is that pre-procedural intensive statin treatment activates cardioprotection and vascular repair by stimulating proliferation, mobilization and homing of EPCs, with subsequent augmentation of circulating and cardiovascular tissue-resident EPCs, in a manner independent of cholesterol synthesis [23].

We tested this hypothesis in the setting of a pre-specified subanalysis of patients enrolled in the Rosuvastatin for REduction of Myocardial damage and systemic inflammation During coronary angioplasty (REMEDY) trial, specifically investigating whether acute statin treatment before PCI is accompanied by (and is therefore possibly mechanistically linked to) an increase in CEC/EPC levels and functional activities.

## Materials and methods

### Study population and design

The present report derives from a pre-defined single-institution (“G. d’Annunzio” University Cardiology Division at Chieti, Italy) substudy of the *Rosuvastatin For REduction Of Myocardial Damage During Coronary Angioplasty* (REMEDY) clinical trial.

REMEDY (Eudract Number: 2009-013622-17; ClinicalTrials.gov Identifier = NCT02205775) was a prospective, multicenter, double-blind, randomized clinical trial, examining consecutive patients with stable CAD or a previous acute coronary syndrome (ACS) off the acute phase, undergoing elective percutaneous coronary intervention (PCI) with stenting. The design of the study, as well as of its main substudies, have been published [23]. The primary results of the REMEDY trial have not been published and likely will not, because, when less than half the projected patients had been included, the sponsoring company with a unilateral decision decided to interrupt the funding. Therefore, only two centers, Chieti and Naples, continued the mechanistic substudies with their own resources, only relying upon the availability of the randomization treatments still available.

The design of the present substudy is illustrated in Fig 1. Inclusion criteria, as for the main REMEDY trial [23], were: 1) stable coronary artery disease (CAD) with inducible myocardial ischemia and indication to coronary angiography; or 2) non-ST-segment (NSTE) ACS or STEMI deemed to require an invasive strategy, but with stabilized markers of myocardial necrosis (CK-MB or troponins, with variation <20% in 2 consecutive measurements obtained at  $\geq 6$  h time distance before PCI, according to the second universal definition of periprocedural myocardial infarction [24]). Exclusion criteria, as in the main REMEDY trial, were: STEMI or NSTE-ACS with high-risk features warranting emergency coronary angiography; any increase in liver enzymes (aspartate amino transferases/alanine amino transferases) ascribed to liver dysfunction at baseline; left ventricular ejection fraction <30%; renal failure with creatinine >2 mg/dL; history of liver or muscle disease; ongoing treatment with high-dose statins (atorvastatin 80 mg/day or rosuvastatin 40 mg/day); pregnancy and lactation.

Patients were randomized into 4 treatment groups:

1. standard background treatment (performing PCI on the background of standard treatment, without any change of the therapy received, according to local practice), and placebo twice immediately before PCI;
2. standard background treatment plus atorvastatin 80 mg + 40 mg before PCI (same daily dosage as in the ARMYDA study [25–27]);
3. standard background treatment plus rosuvastatin 40 mg twice before PCI;
4. standard background treatment + rosuvastatin 5 mg + 10 mg ezetimibe twice before PCI (dosages expected to be equipotent, in terms of LDL cholesterol reduction, to the rosuvastatin regimen, but testing a largely HMG-CoA reductase inhibition-independent way of reducing LDL cholesterol).

Due to the acute nature of the interventions, no changes in plasma lipids were expected as the result of treatment, and therefore were not sought. No independent measures of treatment intake were therefore obtained. However the intake of the double-blinded study medications was witnessed by the investigators responsible of their administration.

Informed consent was obtained from all patients. This specific substudy, in addition to the main study, was approved by the local Ethics Committee (Full name: “Comitato Etico delle Province di Chieti e Pescara e dell’Universita’ degli Studi “G. d’Annunzio” di Chieti-Pescara”).

REMEDY EPC Substudy Design at “G. D’Annunzio” University - Chieti

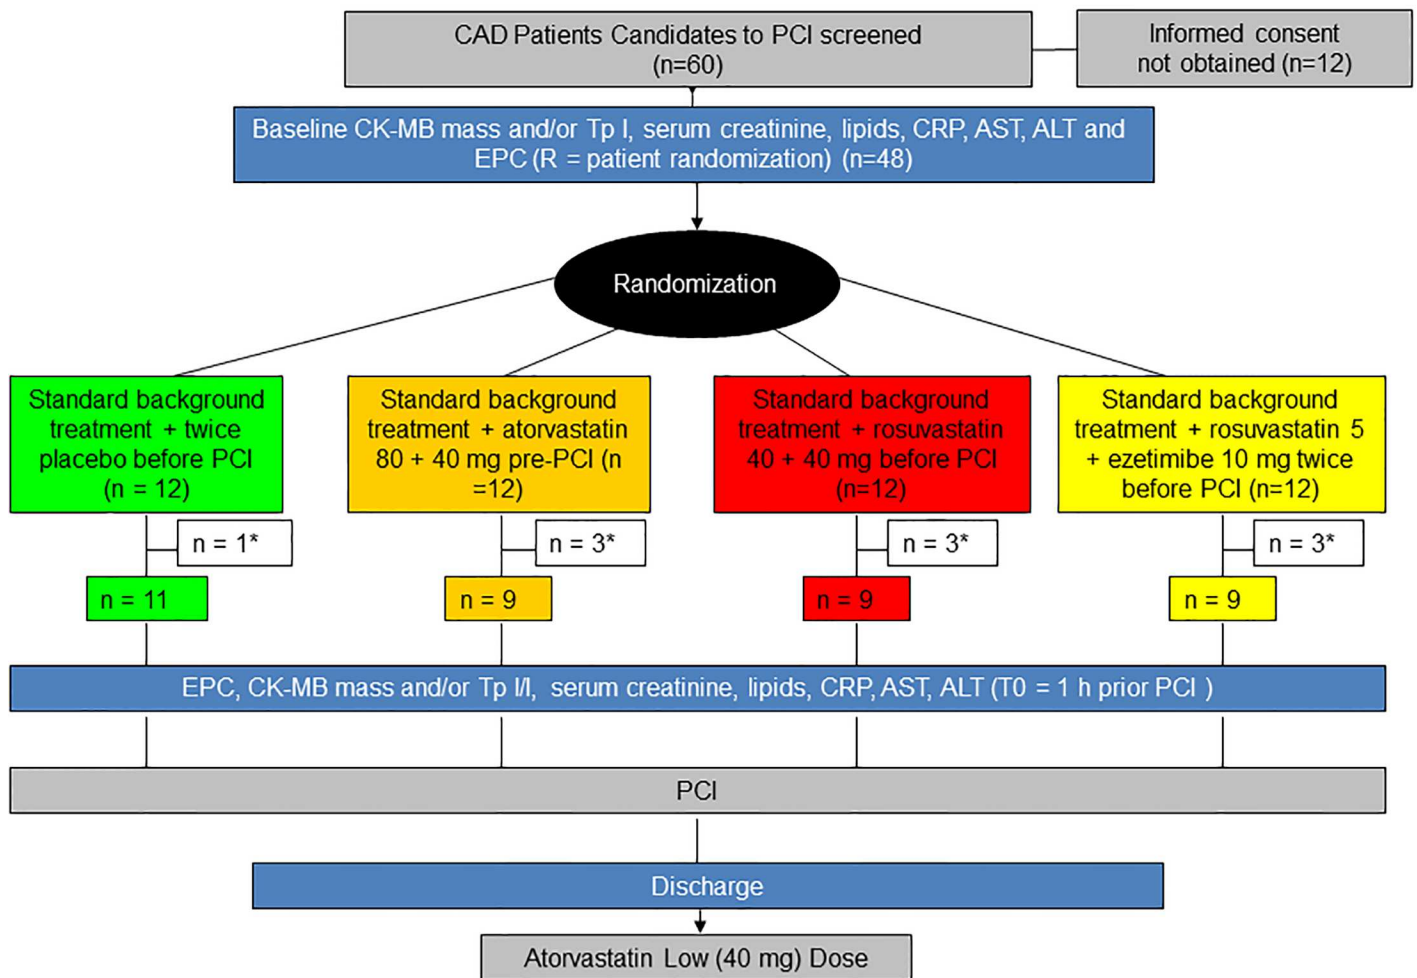

**Fig 1. Study design of the REMEDY-EPC early substudy.** Coronary artery disease (CAD) patients candidate for an elective percutaneous coronary interventions (n = 60) were screened, Forty-eight of them, providing written informed consent, were enrolled and randomly allocated to 4 treatment strategy groups comprising placebo or 3 lipid-lowering treatments, as illustrated. The final analysis consisted of n = 38 patients due to some missing sampling (indicated by \*), as illustrated. Sampling for the identification and quantification of endothelial progenitor cells (EPCs) and circulating endothelial cells (CECs) were performed at the time of randomization (sample R), and 1 hour before the diagnostic angiography and PCI, at time of treatment reload (placebo or lipid-lowering treatments, sample T0).

<https://doi.org/10.1371/journal.pone.0172800.g001>

All participants provided their written informed consent to participate in this study. The Ethics Committee approved this consent procedure. Data obtained were managed blindly.

According to the protocol, patients were treated before intervention with aspirin (100 mg/day) and clopidogrel (75 mg/day if on chronic (>3 day) treatment; or given a 300–600 mg loading at least 6 h before the procedure if previously untreated with a P2Y<sub>12</sub> inhibitor. Procedural success was defined as a residual stenosis <30% diameter. After PCI, aspirin (100 mg/day) was continued indefinitely, whereas clopidogrel (75 mg/day) was administered for at least 1 month (6–12 months in patients treated for ACS or receiving drug-eluting stents). After the intervention, all patients were treated with atorvastatin (40 mg/day), irrespective of the initial randomization assignment.

At the time of randomization and at the time of treatment reload immediately before the diagnostic angiography and PCI, peripheral blood was collected to measure CEC levels and

EPC levels and functional activity (see below). In addition, plasma lipids (total cholesterol, high-density lipoprotein (HDL) cholesterol, triglycerides, to derive low-density lipoprotein (LDL) cholesterol according to the Fredrikson formula), were measured before treatment; creatine kinase (CK), CK-MB (mass), troponin-I (mass), and myoglobin were assayed—before and after the acute treatment—with standard centralized laboratory assays. The upper limits of normal (ULN) were defined as the 99th percentile of a normal population with a <10% total imprecision according to the Joint European Society of Cardiology/American College of Cardiology Universal Myocardial Infarction definition [24]. C-reactive protein (CRP) levels were also measured at the same time points. CRP were assayed by the Kryptor ultrasensitive immunofluorescent assay (Brahms, Hennigsdorf, Germany), with a detection limit of 0.06 mg/L.

**Endpoint definitions.** The primary objective of the REMEDY-EPC early substudy was to compare changes of CEC levels and EPC levels and functional activities essential for vasculogenesis (early and late EPC colony formation, proliferation, migration and tube formation) resulting from the acute randomization treatments before PCI.

### Collection and processing of peripheral blood for CEC and EPC levels

To monitor changes in CEC and EPC levels, 12 mL peripheral blood (the minimum amount required to obtain a visible 3-layer stratification for mononuclear cell isolation) were collected into ethylenediaminetetraacetic acid (EDTA)-treated tubes (4 tubes/patient) at the time of randomization (sample R), and at the time of treatment reload (sample T0), this latter performed 1 h before diagnostic angiography and PCI. Blood samples were maintained in EDTA-treated tubes at +4°C, and used within 5 h for mononuclear cell (MNC) isolation and assays of functional activities.

**CEC/EPC isolation.** All culture methods to identify CEC/EPC levels require a preliminary step of mononuclear cell isolation from peripheral blood. Therefore, peripheral blood mononuclear cells were isolated from 12 mL of peripheral blood by gradient centrifugation using Ficoll-Paque PLUS (Amersham). Twelve mL of peripheral blood (in 4 ethylenediaminetetraacetic acid (EDTA)-containing vacutainers [BD Vacutainer Eclipse, 21 G x 1-1/4", 0.8 x 32 mm), in EDTA (2 mg/mL) tubes (BD K<sub>2</sub>E EDTA, Becton Dickinson Biosciences (BD), San Jose, CA, USA) were mixed with 1 part of phosphate-buffered saline (PBS). An equal volume of Ficoll was placed in a 50 mL Falcon tube, and the blood-PBS mixture was carefully stratified onto Ficoll. The tube was then centrifuged at 400 x g at 20°C for 35 min. Three layers were obtained at the end of centrifugation: a. an upper layer, containing plasma + PBS; b. a middle layer, containing monocytes and lymphocytes; c. a lower layer, containing Ficoll, neutrophils and erythrocytes. The middle layer was gently aspirated and placed in a new 50 mL Falcon tube, to which 25 mL cold PBS were added, and then further centrifuged at 400 x g for 5 min. The upper layer was then snap-frozen at -80°C, in 3 mL aliquots, in cryovials for further biochemical determinations (for adhesion molecules, growth factors, and cytokines, not the subject of this report). The pellet was then resuspended in 30 mL PBS/5% fetal calf serum, centrifuged at 400 x g for 5 min, washed again, then used for colony forming units-endothelial cells (CFU-EC) and the isolation of late outgrowth colonies.

**CFU-EC isolation and quantification.** CFU-EC also known as CFU-Hill [28]) were cultured using the EndoCult<sup>®</sup> Liquid Medium kit (Stem Cells Inc., Vancouver, Canada), according to the manufacturer's instructions and as described in detail previously [29]. The cells organize in small clusters of central rounded cells, with radiating spindle-shaped cells that disappear from the 10–14 day on (Fig 2, panel A). At day 5 after plating in fibronectin-coated 24-well plates, clusters were counted in 8 randomly selected high-power (20x magnification) fields.

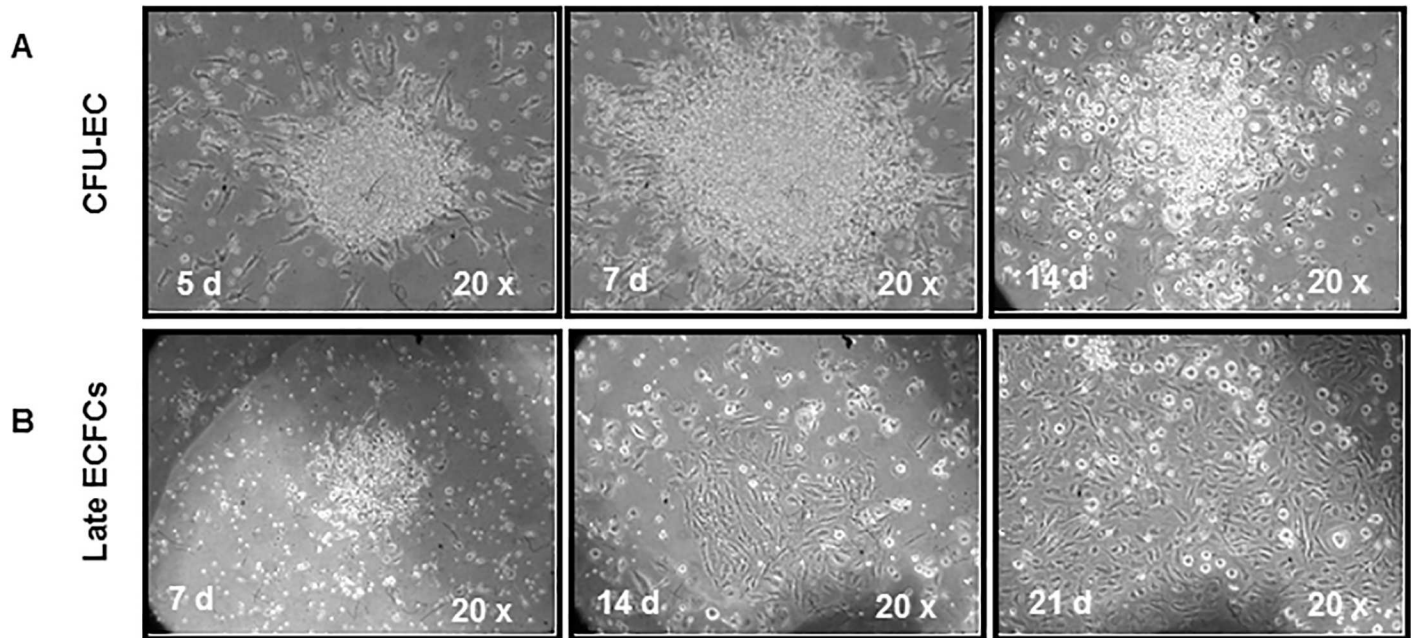

**Fig 2. Colony forming units-endothelial cells and late endothelial colony forming cells.** Representative images of colony forming units-endothelial cells or CFU-Hill (A) and late endothelial colony forming cells or ECFCs (B) in patients at time of treatment reload.

<https://doi.org/10.1371/journal.pone.0172800.g002>

**Isolation and quantification of late outgrowth colonies.** Late outgrowth colonies, also called endothelial colony forming cells (ECFCs), were isolated as previously described [30]. Briefly,  $1 \times 10^6$  peripheral blood mononuclear cells were plated onto fibronectin-coated 6-well plates, and cultured in endothelial cell basal medium (EBM)-2 (Cambrex Bio Science Walkersville Inc., Walkersville, MD, USA), with Endothelial Cell Growth Medium (EGM™)-2 supplement (Cambrex) for 15 days. The culture medium was changed first on day 4, and then every 2 days. With this culture system, attaching cells rapidly assume an endothelial-like shape, and starting from days 3–6 of culture, proliferate in clusters or small colonies made-up of a central core of rounded cells surrounded by radiating spindle-shaped cells. Starting from days 10–14, cells also organize in large colonies with a cobblestone appearance, which are considered endothelial colonies, and become confluent starting from days 21 (Fig 2 panel B). Clusters were visualized under an inverted microscope every 3 days starting from days 7–14, and counted, at days 14 and 21 after plating, in 8 randomly selected 10x magnification fields.

### Tube formation assay

The tube formation assay was performed on late ECFCs collected at days 21, with a minimal volume of Matrigel in 96-well plates (BD), which allows the formation of both tubules and a vascular network. After detachment from the plates at day 21 with the use of 0.25% trypsin,  $1 \times 10^4$  late ECFCs were placed on a matrix solution with EGM-2 microvascular (MV) medium, and incubated at 37°C for 16 h. Tube formation was monitored with an inverted phase-contrast microscope (Leica, Wetzlar, Germany), and picture taken by an attached digital output Olympus camera. Tube formation indices (including tube areas, tube length, and tube number) were quantified with the National Institutes of Health (NIH) version 1.49 Image software.

| Detection        | Fluorochrome/<br>Reagent | Vendor        | Ab Clone     | Catalog<br>Number | Amount per<br>Test          |
|------------------|--------------------------|---------------|--------------|-------------------|-----------------------------|
| DNA              | Syto16                   | Thermo Fisher | -            | S-7578            | 1 $\mu$ M                   |
| <b>CD146</b>     | <b>PE</b>                | <b>BD</b>     | <b>P1H12</b> | <b>623920*</b>    | <b>40 <math>\mu</math>L</b> |
| <b>Viability</b> | <b>7-AAD</b>             | <b>BD</b>     | -            | <b>623920*</b>    | <b>10 <math>\mu</math>L</b> |
| <b>CD34</b>      | <b>PE-Cy7</b>            | <b>BD</b>     | <b>8G12</b>  | <b>623920*</b>    | <b>10 <math>\mu</math>L</b> |
| <b>CD45</b>      | <b>APC-H7</b>            | <b>BD</b>     | <b>2D1</b>   | <b>623920*</b>    | <b>10 <math>\mu</math>L</b> |
| <b>VEGFR2</b>    | <b>AlexaFluor647</b>     | <b>BD</b>     | <b>89106</b> | <b>623920*</b>    | <b>20 <math>\mu</math>L</b> |
| CD144            | V450                     | BD            | 55-7H1       | 561569            | 5 $\mu$ L                   |

**Fig 3. Flow cytometry specificities and reagents.** Reagents composing the lyophilized panel are evidenced in bold face. Other reagents added to the basic panel are listed in plain fonts. \*Catalog number of the lyophilized combination. Abbreviations: PE = R-phycoerythrin; 7-AAD = 7-AminoActinomycin D; Cy7 = PE-Cyanine; APC-H7 = Allophycocyanin-Hilite<sup>®</sup>7; BD = Becton Dickinson Biosciences (San Jose, CA, USA).

<https://doi.org/10.1371/journal.pone.0172800.g003>

### Multi-color flow cytometry

The first 3 mL of peripheral blood withdrawn were discarded and not used for the flow cytometry analysis to avoid the effects of the venipuncture damage on CEC numbers. Every first mL of the blood sampling was instead used to determine the sample leukocyte count, in order to assess total white cell count and lymphocyte absolute count by using double platform counting.

**Instrument setting.** Once set, the performance, stability, and data reproducibility of the flow cytometer were daily checked in real time using the BD<sup>™</sup> Cytometer Setup and Tracking (CS&T) Quality Control Module, and further validated by the acquisition of Spherotech 8 Rainbow Beads peaks (Spherotec. Lake Forest, IL, USA), as well as of CS&T bright beads [31]. Afterwards, stabilization of the laser lamp was done for a period of 30 min.

**Reagents/antibodies panel.** CECs were identified as CD34<sup>bright</sup>/CD45<sup>-</sup>/CD144<sup>+</sup>/CD146<sup>+</sup> events, together with DNA staining and dead cell exclusion, by using an already established panel of reagents [31]. To improve standardization, liquid reagents for the panel and the respective control tube (Figs 3 and 4) were lyophilized as described [31]. A single lot of lyophilized reagent tubes was used for the entire study.

**Sample staining.** For each sample, 20 x 10<sup>6</sup> leukocytes were processed within 4 h from blood collection, as described [32]. Briefly, the sample volume containing 20 x 10<sup>6</sup> leukocytes underwent an erythrocyte lysis step through the addition of 45 mL of Pharm Lyse solution (BD) for 15 min at room temperature under gentle agitation, as per the manufacturer's instructions. Samples were then centrifuged (400 x g for 10 min at room temperature) and washed by adding 2 mL of staining buffer, containing bovine serum albumin (BD). Surface staining was carried out by adding the pellet of each sample to the re-hydrated lyophilized cocktail of reagents. To this, 1  $\mu$ M Syto-16 (Thermo Fisher Scientific, Waltham, MA, USA) and V450-conjugated anti-CD144 (i.e. conjugated with fluorochrome V450, with 406 nm excitation and 450 nm emission) were added as a liquid drop to each panel tube (Figures 3 and 4). Samples were incubated in the dark for 30 min at 4°C, washed into 2 mL of staining buffer with bovine serum albumin, and resuspended in 1.5 mL of FACSFlow buffer (BD).

**Data acquisition.** A minimum of 2 x 10<sup>6</sup> and a maximum of 4 x 10<sup>6</sup> events/sample with lymph-monocyte morphology were acquired by flow cytometry with a FACSCanto apparatus (BD) at a "medium" flow rate (60  $\mu$ L/min of sample). A threshold combination was used on the forward scatter (FSC) and the fluorescein isothiocyanate (FITC) (Syto16) channels to get rid of very small and non-nucleated events. The specificity of anti-CD144, anti-CD146 and anti-VEGFR2 bindings were assessed with the use of isotype-matched controls at the same

| Tube                | Antibody/Reagent                | Antibody Clone | Purpose                   |
|---------------------|---------------------------------|----------------|---------------------------|
| <b>PANEL TUBE</b>   |                                 |                |                           |
|                     | Syto16                          | -              | DNA probe                 |
|                     | <b>CD146 PE</b>                 | <b>P1H12</b>   | <b>Endothelial marker</b> |
|                     | <b>7-AAD</b>                    | -              | <b>Viability probe</b>    |
|                     | <b>CD34 PE-Cy7</b>              | <b>8G12</b>    | <b>Endothelial marker</b> |
|                     | <b>CD45 APC-H7</b>              | <b>2D1</b>     | <b>Leukocyte marker</b>   |
|                     | <b>VEGFR2 (CD309) Alexa 647</b> | <b>89106</b>   | <b>Endothelial marker</b> |
|                     | CD144 V450                      | 55-7H1         | Endothelial marker        |
| <b>CONTROL TUBE</b> |                                 |                |                           |
|                     | Syto16                          | -              | DNA probe                 |
|                     | <b>Isotype PE</b>               | <b>MOPC-21</b> | <b>Isotype Control</b>    |
|                     | <b>7-AAD</b>                    | -              | <b>Viability probe</b>    |
|                     | <b>CD34 PE-Cy7</b>              | <b>8G12</b>    | <b>Endothelial marker</b> |
|                     | <b>CD45 APC-H7</b>              | <b>2D1</b>     | <b>Leukocyte marker</b>   |
|                     | <b>Isotype Alexa Fluor 647</b>  | <b>MOPC-21</b> | <b>Isotype Control</b>    |
|                     | Isotype V450                    | MOPC-21        | Isotype Control           |

**Fig 4. Composition of the flow cytometry panel and control tubes.** Reagents composing the lyophilized panel are evidenced in bold face. Other reagents added as liquid drop in to the basic panel are listed in plain fonts. Abbreviations: PE = R-phycoerythrin; 7-AAD = 7-AminoActinomycin D; Cy7 = PE-Cyanine 7; APC = Allophycocyanin = APC; APC-H7 = Allophycocyanin-Hillite<sup>®</sup>7.

<https://doi.org/10.1371/journal.pone.0172800.g004>

concentration and from the same manufacturers of the respective specific antibodies. Compensations were done using CompBeads (BD) and single-stained fluorescent cells. Carryover between samples was prevented by appropriate instrument cleaning at the end of each sample acquisition.

**Gating strategy.** Events displaying the typical lymph-monocyte morphology were first selected in a forward scatter (FSC) versus side scatter (SSC) plot. Next, dead cells were excluded (on a 7-amino-actinomycin D (7-AAD)/FSC dot plot) on the basis of their positivity to 7-AAD, and nucleated events were gated. The aforementioned 3-gating plots were intersected, and cells resulting from this logical combination characterized by lymph-monocyte morphological features, being also alive and nucleated, were then analyzed for CD45 and CD34 expression on a CD45/CD34 dot plot. The whole CD34<sup>+</sup> cell compartment was identified, and two subpopulations, displaying different levels of CD34 surface expression, were identified and gated separately. These were CD34<sup>+</sup> cells, which are CD45<sup>dim</sup> and represent the hematopoietic stem cell compartment; and a CD34<sup>bright</sup> population, which resulted to be CD45<sup>neg</sup> (CD45<sup>-</sup>). Both the hematopoietic stem cell (HSC) and the CD34<sup>bright</sup>/CD45<sup>-</sup> cell populations were then analyzed for the expression of CD144, CD146 and CD309, on CD144/CD34, CD146/CD34 and CD309/CD34 dot plots, and compared with their respective control tube dot plots, containing the isotype controls.

**Data analysis.** Data were centrally collected and analyzed by a single operator by using the FACSuite v1.04 (BD) software. To ensure the correct identification of negative and positive populations, cells were plotted using a dot-plot bi-exponential display. In order to assess non-specific fluorescence, both fluorescence minus one (FMO, a type of control employed in experiments using multiple dyes, in which all labels are included except the one suspected to give spectral overlap) and isotype controls in combination with all the remaining surface reagents present in the panels were used [33, 34].



**Counting formula.** CECs and hematopoietic stem cell numbers were calculated by a dual-platform counting method, and absolute numbers were obtained by using the already reported formula [31].

## Statistical analyses

All parameters of in vitro angiogenesis and clonogenic activity, as well as antigen expression measured before and after treatments were compared with the Wilcoxon matched-pairs signed ranks test to evaluate possibly significant changes. Baseline characteristics among the intervention groups were compared using the Fisher's exact test for categorical variables, and the Wilcoxon signed-rank test for continuous ones. The Kruskal-Wallis test was then used to assess whether the post-pre difference in each parameter differed by treatment group, gender, smoking, history of cardiovascular diseases (CVD), hypercholesterolemia, dyslipidemia, diabetes, hypertension, and diagnosis of stable CAD.

As a secondary analysis, Spearman's correlation coefficients were used to explore the relationships between between couples of post-pre differences for each parameter. Statistical significance was defined as a two-sided p-value <0.05 for all analyses. These were carried out using the Stata 2013 version 13.1 software (Stata Corp., College Station, Texas, USA). A formal sample size calculation to detect differences in the various study arms was not performed, due to the lack of precise data on the topic in the literature. All analyses are therefore to be considered exploratory and underpowered, and p-values are therefore not reported. Patients whose blood sample was not enough for both analysis (flow cytometry and colony assay) were not included in the study and the blood was discarded in such cases.

## Results

### Patient characteristics

Patient recruitment for this study started in November 2011 and was completed in November 2013. A total of 60 patients, candidates for coronary angiography were screened. Of these, 12 patients did not give their consent to the study and were therefore withdrawn from further analysis. For 10 patients, blood samples sufficient for EPC and CEC analyses at both time points were not available. Thus, 38 patients were finally included and analyzed. Their mean age was  $71 \pm 5$  years, and 74% were men. Of these 38 patients, 9 received atorvastatin 80 mg + 80 mg, 9 received rosuvastatin 40 mg + 40 mg, 9 received rosuvastatin 5 mg and ezetimibe 10 mg, and 11 received placebo (Fig 1).

Patient characteristics are depicted in Fig 5. 50% of the study population had a previous ACS off the acute phase. There were no statistically significant between-group differences in any of the group characteristics, and no differences were also found between patients who received any lipid-lowering agents, however combined, and those who received placebo.

### Effects of treatments on indices of myocardial damage, and side effects

Due to the short course of treatment, no effects on plasma lipids were hypothesized, and not actually investigated. No changes in any of the other laboratory parameters assessed to monitor myocardial damage, including myoglobin, CK-MB or troponin-I were found (Fig 6).

### Effects of treatments on EPCs and CECs

In patients treated with ezetimibe and/or high-dose statins, the change of mean number of EPCs-CFU/plate and EPCs-ECFCs/plate (Fig 6), as well as in any parameter of EPC-ECFC tubulization activity (Fig 6), were all non-significant compared with placebo (for all,  $p > 0.05$ ).

|                                     | Placebo   | Atorvastatin 80+40 mg | Rosuvastatin 40+40 mg | Rosuvastatin 10 mg+Ezetimibe 10 mg | Atorvastatin 80+40 mg + Rosuvastatin 40+40 mg + Rosuvastatin 10 mg+ Ezetimibe | Atorvastatin 80+40 mg + Rosuvastatin 40+40 mg |
|-------------------------------------|-----------|-----------------------|-----------------------|------------------------------------|-------------------------------------------------------------------------------|-----------------------------------------------|
|                                     | n=11      | n=9                   | n=9                   | n=9                                | n=27                                                                          | n=18                                          |
| Age (mean ± SD)                     | 65±7      | 62±8                  | 64±8                  | 65±7                               | 64±7                                                                          | 63±8                                          |
| Male gender, n (%)                  | 6 (54.5)  | 5 (55.6)              | 5 (55.6)              | 5 (55.6)                           | 15 (55.6)                                                                     | 10 (55.6)                                     |
| White race - n (%)                  | 11 (100)  | 9 (100)               | 9 (100)               | 9 (100)                            | 27 (100)                                                                      | 18 (100)                                      |
| Cardiovascular risk factors - n (%) |           |                       |                       |                                    |                                                                               |                                               |
| Diabetes mellitus                   | 2 (18.2)  | 3 (33.3)              | 2 (22.2)              | 3 (33.3)                           | 8 (29.2)                                                                      | 5 (27.8)                                      |
| Arterial hypertension               | 8 (72.7)  | 7 (77.8)              | 6 (66.7)              | 8 (88.9)                           | 21 (77.8)                                                                     | 15 (83.3)                                     |
| Hypercholesterolemia                | 0 (0.0)   | 3 (33.3)              | 0 (0.0)               | 0 (0.0)                            | 3 (11.1)                                                                      | 3 (16.7)                                      |
| Dyslipdemia                         | 11 (100)  | 4 (44.4)              | 7 (77.8)              | 8 (88.9)                           | 19 (70.4)                                                                     | 11 (61.1)                                     |
| Smoker - n (%)                      |           |                       |                       |                                    |                                                                               |                                               |
| Current smoker                      | 4 (36.4)  | 2 (22.2)              | 2 (22.2)              | 2 (22.2)                           | 6 (22.2)                                                                      | 4 (22.2)                                      |
| Previous smoker                     | 1 (9.1)   | 3 (33.3)              | 2 (22.2)              | 1 (11.1)                           | 6 (22.2)                                                                      | 5 (27.8)                                      |
| Famiy history of CAD - n (%)        | 4 (36.4)  | 2 (22.2)              | 3 (33.3)              | 3 (33.3)                           | 8 (29.6)                                                                      | 5 (27.8)                                      |
| CAD - n (%)                         |           |                       |                       |                                    |                                                                               |                                               |
| 1-vessel                            | 2 (18.2)  | 4 (44.4)              | 3 (33.3)              | 2 (22.2)                           | 9 (33.3)                                                                      | 7 (38.9)                                      |
| 2-vessel                            | 5 (45.5)  | 0 (0.00)              | 1 (11.1)              | 1 (11.1)                           | 2 (7.4)                                                                       | 1 (5.5)                                       |
| 3 vessel                            | 0 (0.0)   | 3 (33.3)              | 1 (11.1)              | 1 (11.1)                           | 5 (18.5)                                                                      | 4 (22.2)                                      |
| PCI - n (%)                         |           |                       |                       |                                    |                                                                               |                                               |
| Bare metal stent                    | 3 (27.3)  | 2 (22.2)              | 1 (11.1)              | 1 (11.1)                           | 4 (14.8)                                                                      | 3 (16.7)                                      |
| Drug eluting stent                  | 3 (27.27) | 3 (33.3)              | 3 (33.3)              | 1 (11.1)                           | 7 (25.9)                                                                      | 6 (33.3)                                      |
| Stents - n (%)                      |           |                       |                       |                                    |                                                                               |                                               |
| 0                                   | 5 (45.5)  | 4 (44.4)              | 5 (55.6)              | 7 (77.8)                           | 16 (59.2)                                                                     | 9 (50.0)                                      |
| 1                                   | 5 (45.5)  | 4 (44.4)              | 4 (44.4)              | 1 (11.1)                           | 9 (33.3)                                                                      | 8 (44.4)                                      |
| 2                                   | 1 (9.1)   | 1 (11.1)              | 0 (0.0)               | 1 (11.1)                           | 2 (7.4)                                                                       | 1 (5.5)                                       |
| CABG - n (%)                        | 1 (9.1)   | 1 (11.1)              | 1 (11.1)              | 3 (33.3)                           | 5 (18.5)                                                                      | 2 (11.1)                                      |

**Fig 5. Baseline characteristics of the population studied, divided in the various study groups.** Abbreviations: SD = standard deviation; CAD = coronary artery disease; PCI = percutaneous coronary intervention; CABG = coronary artery bypass graft surgery; CAD = coronary artery disease.

<https://doi.org/10.1371/journal.pone.0172800.g005>

Changes in EPC-CFU-EC and EPCs-ECFC levels, and in any parameter of tubulization activity of EPCs-ECFCs as the result of treatments (after treatment–before treatment =  $\Delta$ ) were non-significant ( $p > 0.05$ ). In patients treated with ezetimibe and/or high-dose statins there was a trend towards an increase of EPC level after active treatments as compared with placebo, but this was not statistically significant. This trend was however only observed in patients treated with high-dose rosuvastatin or the rosuvastatin+ezetimibe combination, and not in the atorvastatin group.

For flow cytometry analyses, a gating strategy was used, by which events displaying any lymph-monocyte morphology, alive and nucleated, were firstly gated, while dead cells and non-nucleated events were excluded in order to remove non-specific signals. Alive and nucleated lymph-monocyte cells were then analyzed for their expression of CD34 and CD45. Two different levels of CD34 surface expression allowed the identification of distinct CD34<sup>+</sup> cell subpopulations. A subset of CD34<sup>+</sup>/CD45<sup>dim</sup> cells, matching the antigen profile of HSC, and a more restricted subpopulation of cells expressing bright levels of CD34 and resulting to be CD45 negative, were detected. Subsequently, cells staining positive or bright for CD34 and dim or negative for CD45 were analyzed for the endothelial cell markers CD144, 146 and CD309. We found no significant changes as the result of treatments between the absolute numbers of all CD34<sup>+</sup>/CD45<sup>-</sup> events (Fig 6) or CECs (CD34<sup>bright</sup>/CD45<sup>-</sup>/CD144<sup>+</sup>/CD146<sup>+</sup>) (Fig 6), or HSC (Fig 6) in the ezetimibe and/or high-dose statin treatments, and no significant differences vs the placebo group. Furthermore, all subsets of CD34<sup>+</sup>/CD45<sup>-</sup> cells, negative for CD144, CD146 and CD309 (Fig 6), or resulting from the different combinations of CD144,

|                             | Plac (n=11) |             |             | At80+40 (n=9) |             |             | Ro40+40 (n=9) |             |            | RoEz (n=9) |             |            | All (n=27)  |             |            | NoEz (n=18) |             |            |
|-----------------------------|-------------|-------------|-------------|---------------|-------------|-------------|---------------|-------------|------------|------------|-------------|------------|-------------|-------------|------------|-------------|-------------|------------|
|                             | T0          | T1          | Δ T1-T0     | T0            | T1          | Δ T1-T0     | T0            | T1          | Δ T1-T0    | T0         | T1          | Δ T1-T0    | T0          | T1          | Δ T1-T0    | T0          | T1          | Δ T1-T0    |
| <b>Outcomes</b>             |             |             |             |               |             |             |               |             |            |            |             |            |             |             |            |             |             |            |
| CK-MB *                     | 1.5 (1.99)  | 2.2 (1.32)  | 0.8 (0.5)   | 1.4 (1.75)    | 0.9 (0.1)   | 0.1 (0.05)  | 1.5 (3.1)     | 1.2 (1.95)  | 0.2 (0.1)  | 2 (1.2)    | 1.2 (0.8)   | 0.0 (0.0)  | 1.77 (1.9)  | 1.2 (1.3)   | 0.1 (0.0)  | 1.5 (2)     | 1.15 (1.2)  | 0.2 (0.02) |
| Troponin-I *                | 0.015 (0)   | 0.05 (0.12) | 0.05 (0.4)  | 0.015 (0.0)   | 0.015 (0.0) | 0.00 (0.0)  | 0.015 (0.0)   | 0.015 (0.0) | 0.00 (0.0) | 0.01 (0.0) | 0.015 (0.0) | 0.0 (0.0)  | 0.015 (0.0) | 0.015 (0.0) | 0.00 (0.0) | 0.015 (0.0) | 0.015 (0.0) | 0.00 (0.0) |
| Myoglobin *                 | 55 (33.75)  | 64 (147.5)  | 43 (22)     | 81 (1.2)      | 92 (2)      | 13 (8)      | 81 (55)       | 72 (32)     | 2 (5)      | 45 (35)    | 72 (55)     | 36 (23)    | 71 (23)     | 74 (23)     | 8 (3)      | 81 (57)     | 76 (25)     | 0.0 (5)    |
| <b>Angiogenesis</b>         |             |             |             |               |             |             |               |             |            |            |             |            |             |             |            |             |             |            |
| Mean network area           | 975 (1251)  | 736 (1482)  | -204 (5537) | 1252 (2652)   | 2400 (1494) | -215 (1151) | 491 (187)     | 626 (1607)  | 186 (1560) | 749 (909)  | 1316 (1713) | 456 (395)  | 627 (1344)  | 748 (1521)  | 261 (813)  | 561 (1344)  | 748 (1521)  | 112 (521)  |
| Total n. of networks        | 19 (7)      | 8 (8)       | -10 (12)    | 8.5 (4)       | 5.5 (9)     | -6 (10)     | 17 (24)       | 28 (15)     | 10 (9)     | 4 (27)     | 10 (6)      | 5.5 (8)    | 8 (21)      | 11 (17)     | 5.5 (16)   | 8.5 (18)    | 15 (20)     | 5 (17)     |
| Tubule length               | 118 (14)    | 111 (95)    | 1.1 (0.9)   | 151 (133)     | 108 (95)    | 1.1 (0.9)   | 84 (17)       | 95 (99)     | 0.9 (1.0)  | 99 (69)    | 120 (59)    | 1.2 (0.6)  | 92 (85)     | 100 (81)    | 1.0 (0.8)  | 89 (117)    | 99 (103)    | 1.0 (1.0)  |
| Total tubules per well      | 19 (7)      | 4 (8)       | -13 (16)    | 5.5 (4)       | 9.5 (5)     | 5 (12)      | 25 (13)       | 25 (26)     | 7.5 (18)   | 15 (24)    | 12 (17)     | 2 (27)     | 9 (20)      | 11 (15)     | 5.5 (21)   | 8 (19)      | 11 (14)     | 6 (15)     |
| <b>N. of colonies</b>       |             |             |             |               |             |             |               |             |            |            |             |            |             |             |            |             |             |            |
| Early (A) - 1 week *        | 44 (85)     | 15 (23)     | -29 (55)    | 4.5 (27)      | 11 (48)     | 5 (9)       | 22 (18)       | 22 (167)    | -1 (108)   | 41 (82)    | 31 (146)    | -4 (17)    | 10 (44)     | 13 (51)     | 2 (13.5)   | 10 (27)     | 13 (45)     | 3 (13)     |
| Early (B) - 1 week *        | 27 (11)     | 10 (20)     | -8 (21)     | 19 (31)       | 13 (33)     | 8 (48)      | 47 (36)       | 38 (49)     | 1.5 (44)   | 30 (98)    | 36 (105)    | 17 (23)    | 22 (40)     | 24 (45)     | 8 (35)     | 22 (42)     | 17 (43)     | 4 (43)     |
| Late - 2 weeks *            | 86 (84)     | 9 (86)      | -1 (2)      | 7 (84)        | 20 (85)     | -0.5 (2)    | 86 (42.5)     | 72 (57)     | 1 (14)     | 5 (2)      | 10 (9)      | 4 (5)      | 5 (84)      | 14 (81)     | 1 (5)      | 49 (84)     | 43 (85)     | 0.5 (2)    |
| Late - 3 weeks *            | 6.5 (14)    | 2 (7)       | -4 (10)     | 9 (14)        | 7 (10)      | -0.5 (7)    | 7.5 (13)      | 13 (17)     | 0.5 (17)   | 6 (9)      | 6 (9)       | 0 (7)      | 7 (12)      | 8 (13)      | 0 (7)      | 8 (14)      | 9.5 (16)    | -0.5 (8)   |
| N. of clusters              | 14 (21)     | 4 (10)      | -6 (17)     | 14 (19)       | 12 (15)     | -1 (11)     | 11 (22)       | 22 (19)     | 1 (22)     | 9 (10)     | 10 (11)     | -0.5 (9)   | 11 (12.5)   | 14 (19)     | 0 (12)     | 11.5 (17)   | 17 (19)     | -1 (15)    |
| <b>Surface antigens_CD*</b> |             |             |             |               |             |             |               |             |            |            |             |            |             |             |            |             |             |            |
| 34+ 45+                     | 25 (31)     | 36 (32)     | 5.3 (52)    | 44 (86)       | 81 (69)     | 23 (86)     | 39 (67)       | 33 (34)     | -6 (102)   | 43 (44)    | 23 (25)     | -19 (70)   | 39 (45)     | 38 (62)     | -4.2 (62)  | 39 (62)     | 53 (51)     | 19 (43)    |
| 146+                        | 6.0 (4.2)   | 4.8 (12)    | -5.0 (11)   | 0.1 (8.1)     | 14 (12)     | 14 (21)     | 22 (26)       | 5.6 (25)    | 5 (29)     | 17 (14)    | 5.9 (5.0)   | -12 (14)   | 8 (20)      | 9.5 (12)    | 0.8 (27)   | 0.3 (18)    | 14 (13)     | 5.7 (14)   |
| 146-                        | 21 (36)     | 31 (49)     | -1.5 (53)   | 35 (92)       | 65 (68)     | 21 (72)     | 17 (42)       | 15 (41)     | -11 (73)   | 20 (20)    | 16 (14)     | -5 (35)    | 21 (30)     | 24 (52)     | 4.1 (47)   | 28 (42)     | 47 (53)     | 14 (42)    |
| 144+                        | 0.1 (1.6)   | 2.5 (3.1)   | 0 (4.8)     | 0 (1.4)       | 2.7 (2.7)   | 2.7 (4.2)   | 2.9 (11)      | 0 (2.6)     | -0.3 (11)  | 0.8 (2.3)  | 0.7 (2.5)   | -0.8 (4.8) | 0 (3.0)     | 1.3 (2.6)   | 0 (4.9)    | 0 (2.9)     | 2.1 (2.4)   | 0 (3.8)    |
| 309+                        | 2.6 (3.6)   | 2.9 (6.5)   | -0.8 (7.6)  | 4.1 (11)      | 7.3 (22)    | 6.7 (12)    | 0 (5.5)       | 0 (8.6)     | 0 (14)     | 11 (20)    | 5.2 (9.4)   | -6 (28)    | 5.5 (12)    | 5.4 (9.4)   | 0 (17)     | 1.1 (7.1)   | 5.4 (6.8)   | 5.4 (12)   |
| 144+ 146+ 309+              | 0 (0)       | 0 (2.2)     | 0 (0)       | 0 (0.6)       | 4.0 (4.9)   | 3.7 (4.9)   | 1.2 (5.5)     | 0 (0)       | -1.2 (5.5) | 1.9 (2.3)  | 0.8 (2.6)   | -1.1 (5)   | 0 (3.8)     | 0 (3.8)     | 0 (1.2)    | 0 (4.2)     | 0 (5.4)     | 0 (5.4)    |
| 144+ 146+ 309-              | 0 (0.9)     | 0.0 (1.4)   | 0 (0.7)     | 0.6 (1.2)     | 0 (0)       | -0.3 (1.1)  | 2.8 (4.8)     | 0 (2.6)     | -2.2 (2.8) | 0 (0)      | 0 (0)       | 0 (0)      | 0 (1.2)     | 0 (0)       | 0 (1.2)    | 1.1 (1.6)   | 0 (0)       | -0.5 (1.2) |
| 144+ 146- 309+              | 0 (0)       | 0 (0)       | 0 (0)       | 0 (0)         | 0 (0.9)     | 0 (0.9)     | 0 (1.2)       | 0 (0)       | 0 (1.2)    | 0 (0)      | 0 (0)       | 0 (0)      | 0 (0)       | 0 (0)       | 0 (0)      | 0 (0)       | 0 (0)       | 0 (0)      |
| 144+ 146- 309-              | 0 (0)       | 0 (0)       | 0 (0)       | 0 (0)         | 0 (0)       | 0 (0)       | 0 (0)         | 0 (0)       | 0 (0)      | 0 (0)      | 0 (0)       | 0 (0)      | 0 (0)       | 0 (0)       | 0 (0)      | 0 (0)       | 0 (0)       | 0 (0)      |
| 144- 146+ 309+              | 1.8 (2.6)   | 0.7 (3.6)   | -0.7 (2.5)  | 4.7 (5.2)     | 4.4 (4.0)   | 1.2 (3.7)   | 1.8 (6.0)     | 0 (1.9)     | 0 (6.2)    | 8.6 (10)   | 2.7 (2.4)   | -5.3 (11)  | 4.7 (7.6)   | 2.9 (3.0)   | 0 (7.9)    | 4.6 (5.2)   | 3.8 (4.6)   | 0 (2.4)    |
| 144- 146+ 309-              | 2.5 (3.4)   | 1.7 (1.6)   | -1.5 (4.6)  | 0 (2.3)       | 5.1 (5.3)   | 3.7 (9)     | 14 (13)       | 3.7 (27)    | 2.8 (27)   | 3.4 (8.0)  | 1.5 (5.6)   | -1.9 (4.0) | 2.3 (9.9)   | 3.7 (9.0)   | 0 (13)     | 0.9 (7.9)   | 4.2 (5.3)   | 2.8 (9.0)  |
| 144- 146- 309+              | 0.4 (0.9)   | 0.9 (6.9)   | 0.5 (1.8)   | 1.8 (7.0)     | 2.5 (21)    | 1.9 (17)    | 0 (0)         | 0 (6.6)     | 0 (6.6)    | 0.8 (12)   | 1.4 (4.3)   | 1.4 (15)   | 0 (7.0)     | 0 (5.4)     | 0 (8.0)    | 0 (2.5)     | 0 (6.6)     | 0 (6.6)    |
| 144- 146- 309-              | 0 (2.4)     | 0 (1.3)     | 0 (1.0)     | 0 (2.2)       | 0.6 (5.3)   | 0.6 (7.6)   | 0 (4.0)       | 0 (0)       | 0 (4.0)    | 0 (0)      | 0 (0)       | 0 (0)      | 0 (2.2)     | 0 (1.2)     | 0 (3.4)    | 0 (2.2)     | 0 (1.2)     | 0 (3.4)    |
| 34+ 45-                     | 14 (8.5)    | 11 (15)     | -0.4 (7.0)  | 23 (17)       | 23 (20)     | 1.2 (6.0)   | 20 (13)       | 15 (5)      | -5.0 (8.0) | 18 (22)    | 18 (18)     | 1.8 (15)   | 21 (18)     | 16 (18)     | -1.3 (12)  | 21 (11)     | 16 (11)     | -1.3 (6.6) |

**Fig 6. Selected markers of myocardial damage, parameters of angiogenesis and clonogenic activities, and surface antigens before and after treatment.** For each parameter, at each time point, numbers represent the median and the interquartile range (this latter in parenthesis). Abbreviations; Plac = placebo; At80+40 = atorvastatin 80 mg + 40 mg; Ro40+40 = rosuvastatin 40 mg + 40 mg; RoEz = rosuvastatin + ezetimibe (these are the treatment groups as defined in Methods); T0, T1 = time 0, time 1, as defined in Methods; Δ T1-T0 = Difference T1-T0; CK-MB = creatine kinase-MB isoform; Early and Late Colonies = as defined in Methods; CD = cluster of differentiation—see Methods for details.

<https://doi.org/10.1371/journal.pone.0172800.g006>

CD146 and CD309 (Fig 6) did not show any significant differences in any of the active treatment groups, or in the placebo group.

We also found overall no correlation between differences (Δ = after minus before treatments) of EPC numbers and activity (according to cell culture method) and differences (Δ = after minus before treatments) of plasma levels of CECs according to flow cytometry methods here used, with the exception of 3 (out of 126) correlation coefficients (Fig 7).

## Discussion

Contrary to the study hypothesis and to previous findings about an acute increase of EPCs/CECs after high-dose lipid lowering treatments, we here found no evidence of any significant change in either the number or the functional activity of such cells after an acute lipid-lowering treatment. These results were obtained adopting a number of complementary techniques for the identification of circulating progenitors, and in the unprecedented setting of a double-blind, randomized, placebo-controlled study.

Since the acute pre-procedural administration of statins has been associated with cardio- and renal protection, including reduced release of myocardial necrosis markers [22] and reduced incidence of contrast media-induced acute kidney injury [35], the hypothesis that some of these effects may be contributed by an acute mobilization of circulating progenitors

| Surface antigens     | In vitro angiogenesis parameters |                      |               |                        | Clonogenic activity: number of colonies |                    |               |               |               |
|----------------------|----------------------------------|----------------------|---------------|------------------------|-----------------------------------------|--------------------|---------------|---------------|---------------|
|                      | Mean network area                | Total n. of networks | Tubule length | Total tubules per well | Early (A) (1 week)                      | Early (B) (1 week) | Late (2 week) | Late (3 week) | N. of cluster |
| CD34+ CD45+          | 0.04                             | 0.02                 | -0.02         | 0.0                    | -0.13                                   | -0.06              | -0.07         | 0.24          | -0.35         |
| CD146+               | 0.20                             | 0.22                 | 0.10          | 0.12                   | 0.14                                    | 0.11               | 0.09          | 0.02          | -0.40         |
| CD146-               | 0.02                             | -0.04                | -0.02         | 0.02                   | -0.22                                   | -0.08              | -0.08         | 0.26          | -0.33         |
| CD144+               | -0.05                            | 0.19                 | -0.02         | 0.24                   | 0.11                                    | 0.12               | 0.11          | 0.15          | <u>-0.56</u>  |
| CD309+               | -0.04                            | 0.11                 | 0.05          | 0.04                   | 0.10                                    | -0.09              | -0.10         | 0.34          | -0.32         |
| CD144+ CD146+ CD309+ | -0.11                            | 0.07                 | -0.19         | 0.10                   | 0.06                                    | 0.10               | -0.01         | -0.08         | -0.27         |
| CD144+ CD146+ CD309- | 0.15                             | 0.19                 | 0.27          | 0.16                   | 0.09                                    | 0.06               | 0.23          | 0.20          | <u>-0.53</u>  |
| CD144+ CD146- CD309+ | -0.14                            | -0.31                | -0.33         | -0.21                  | 0.04                                    | -0.44              | -0.16         | -0.31         | -0.28         |
| CD144+ CD146- CD309- | 0.12                             | 0.22                 | 0.09          | 0.15                   | -0.33                                   | 0.26               | 0.16          | 0.26          | -0.20         |
| CD144- CD146+ CD309+ | -0.05                            | 0.08                 | -0.04         | -0.05                  | 0.32                                    | -0.09              | -0.07         | 0.05          | -0.29         |
| CD144- CD146+ CD309- | 0.19                             | 0.15                 | 0.21          | 0.02                   | 0.09                                    | 0.13               | 0.05          | -0.20         | -0.31         |
| CD144- CD146- CD309+ | 0.0                              | 0.15                 | 0.08          | 0.07                   | -0.02                                   | 0.00               | -0.02         | 0.33          | -0.18         |
| CD144- CD146- CD309- | 0.44                             | 0.28                 | 0.18          | 0.12                   | 0.01                                    | 0.16               | 0.27          | <u>0.50</u>   | -0.23         |
| CD34+ CD45-          | 0.08                             | -0.21                | 0.32          | 0.0                    | -0.20                                   | 0.09               | -0.12         | -0.17         | 0.06          |

**Fig 7. Correlation analysis (Spearman rho) of the differences ( $\Delta$  = after minus before treatments) in angiogenesis and clonogenic activities (independent variable), and the differences ( $\Delta$  = after minus before treatments) in surface antigens.** Abbreviations; AU = Arbitrary Units; Early (A) and early (B) = Hill colony analysis performed by two independent investigators. Only the underlined correlation coefficients were significant. Treatments = atorvastatin 80 mg + 80 mg, rosuvastatin 40 mg + 40 mg, rosuvastatin 10 mg + ezetimibe 10 mg.

<https://doi.org/10.1371/journal.pone.0172800.g007>

had attracted considerable interest. Nevertheless, results from the studies of EPCs and statins in the context of periprocedural myocardial injury, such as during and after PCI, have yielded quite equivocal or discordant results [36]. This may reflect on the one hand the quality of the experimental setting in which such hypotheses were tested; and, on the other hand, the varying manner by which EPCs had been quantified.

There are two possible ways to identify and characterize EPCs: by flow cytometry, looking at cell surface antigenic markers; and by cell culture methods, looking at their functional activities (reviewed in [37]). Currently, 3 main cell culture methods are used to identify 3 types of EPCs with different functions and angiogenic potential: late outgrowth colonies, also known as ECFCs, which are considered as genuine or true EPCs [30]; colony-forming unit (CFU)-Hill cells [28]; and early outgrowth EPCs, also known as circulating angiogenic cells (CACs) [38] (reviewed in [37]). ECFCs display a high proliferative potential, express endothelial antigens, form capillary-like structures when plated on Matrigel, but also blood vessels when suspended in collagen or Matrigel scaffolds and implanted in immunodeficient mice (reviewed in [37]). CFU-Hill cells and CACs display a low proliferative potential, but a great potential to secrete an array of angiogenic cytokines. CFU-Hill cells and CACs are positive for CD45, CD34, CD31 and KDR, and have the capacity to uptake uptake acetylated LDL labeled with 1,1'-dioctadecyl-3, 3', 3'-tetramethyl-indocarbocyanine perchlorate (DiDLDL) [37]. As to the identification and enumeration of EPCs by flow cytometry, EPC antigenic profile continues to be controversial [33, 39], and no consensus guidelines have been agreed upon so far [39, 40]. Therefore, in the present study we decided to analyze CECs by flow cytometry, for which there is at least some agreement in identifying such cells as CD34<sup>bright</sup>/CD45<sup>-</sup>/CD144<sup>+</sup>/CD146<sup>+</sup> events, together with DNA staining and dead cell exclusion [33, 41]. CECs are characterized by mature endothelial features and detach from the vessel walls following vascular damage or because of their physiological turnover [42, 43]. Their levels in peripheral blood

have been reported as decreased after statin treatment [44]. Similarly as for EPCs, CEC characterization and enumeration in the bloodstream has been proposed as a potential biomarker of the response to treatment in several clinical conditions involving vascular damage, regeneration and growth [4, 41, 45–47]. Likewise, preclinical and clinical studies have suggested that EPCs play an essential role in neovascularization, and are biomarkers of atherosclerosis, inversely related to the presence and progression of the disease (reviewed in [37]). The balance of CEC and EPC levels would reflect the endothelial health status [43, 48].

We examined whether the reported beneficial effect of statins in reducing periprocedural myocardial injury is due to their effects on EPCs. We also addressed the important question of whether this is a class effect or, on the contrary, differences exist between rosuvastatin, atorvastatin and the low-dose rosuvastatin/ezetimibe combination. These 3 treatments were selected because achieving similar effects on LDL lowering on chronic treatment. While the first two treatments determine a robust LDL lowering through a substantial inhibition of HMGCoA reductase [49], the third does so by combining a relatively milder HMGCoA reductase inhibition with an interference in LDL intestinal absorption with ezetimibe [50, 51]. The setting of the REMEDY trial, by which these 3 active treatments were compared with placebo in a double-blind double-dummy design, overcomes several of the methodological biases attributable to less rigorous study design, as adopted in virtually all previous studies on this topic. This report addresses the possible impact of tested regimens on early EPC levels and functional activity; another report will deal with longer-term (3-months) effects [23].

Here we prospectively investigated whether the preprocedural exposure to different lipid-lowering drugs (statins and/or ezetimibe) or placebo can acutely (within 24 h) modify levels of CECs and levels and functional activity of EPCs, with potential differences between treatments. While it is generally recognized that statin administration to patients may increase levels of EPCs, identified by varying combinations of surface antigens, in the absence of accepted guidelines [39, 40], the time- and dose-response course of such effects by different lipid-lowering agents had not been previously characterized. Our study is therefore the first attempt to assess functional and antigenic levels of EPCs after the acute administration of various lipid-lowering agents, prospectively administered with random allocation and in a double-blind design. In addition, this is the first study attempting to enumerate CECs and any subsets of CD34<sup>+</sup>/CD45<sup>-</sup> cells, deriving from several combination of endothelial markers (CD144, CD146 and CD309), by flow cytometry in the peripheral blood of CAD patients.

Our data show that the acute (within 24 h) preprocedural administration of different lipid-lowering drugs, at higher doses compared with the usual-doses administered before an elective PCI, is not associated with any evidence of EPC mobilization and/or of any release of CACs from the vessel wall in the peripheral blood, without any differences between either treatments and placebo or among the various treatment here tested. Recently, CECs have been found to define a population of mature endothelial cells, that detach from the vessel walls, following vascular damage or its physiological turnover, and become circulating cells [42, 43]. However, data about the acute effects of statin treatment and PCI on EPCs are debatable, reflecting the heterogeneity of methods used for the evaluation of EPCs and the great variability in statin treatment timing and dosage [36]. Vasa et al. [11] demonstrated, in a series of 15 patients with stable CAD, that a therapy with atorvastatin 40 mg/day increased the number and functional activity of EPCs after 1 week of treatment. More recently, it has been suggested that the effect on EPC mobilization might be dose-dependent: among 100 patients with ischemic heart disease; here treatment with atorvastatin 40 mg/day was associated with a higher EPC level than a regimen of atorvastatin 10 mg/day [52]. At the same time, other groups have shown that chronic statin therapy can be associated with a reduced—rather than increased—EPC number and function. So, Hristov et al. found that a chronic (3-month) statin treatment was associated

with a reduction in the number of circulating EPCs. The dose of continuous statin therapy inversely correlated with EPC number, and patients treated with a 40 mg/day statin (simvastatin or atorvastatin) showed a reduction in EPC number. Interestingly, statin treatment did not affect the functional properties of EPCs tested by the CFU-Hill Assay [53]. Conversely, Deschaseaux et al. found that the number of EPC colonies after 5 days of culture was lower in patients on chronic statin treatment (here with 40 mg/day of pravastatin or simvastatin for at least 4 weeks) compared with those without statin therapy, while long-term statin treatment would preserve late EPC colonies [54]. Recently, a systematic review of preclinical and clinical studies on statin and EPCs [55] reported two clinical studies examining the effect of statin therapy on EPC levels in CAD patients [56, 57]. One study used atorvastatin and the other used rosuvastatin. One study showed an increase in circulating levels of EPCs after 5 days of statin therapy and the other reported greater numbers of CFU-Hill after 6 months of treatment. However, the non-randomized nature of most of these studies and the lack of standard dosing certainly justifies uncertainty in drawing firm conclusions. Data from randomized studies of both early and long-term effects of statin therapy on EPCs are therefore clearly warranted. Our report tries to fill-in such knowledge gap with an appropriate study design and multiple methods to detect and quantify EPCs and CACs. We found no evidence of any acute effect of lipid-lowering therapies on any of the parameters here investigated. We also report no correlations of antigenic vs functional parameters for EPC/CEC assessment (with only 3 out of 126 correlation coefficients turning out to be “statistically significant”, but with no adjustment for multiple testing, which we therefore attribute to the play of chance), casting doubts on the possibility of using such parameters interchangeably in future studies.

## Study limitations

We recognize limitations of our study. Given the relatively small patient population, we cannot rule out the occurrence of a Type 2 statistical error. However, the combination of high statin dose (atorvastatin and rosuvastatin) does not here provide a signal for efficacy, nor such a signal appears even combining the 3 active treatment groups or the similarly acting, atorvastatin and rosuvastatin, with similar potency.

As a second limitation, no data are here available about the EPC behavior in a prolonged follow-up. This was beyond the specific objectives of the present REMEDY-EPC early sub-study, but will be the subject of an independent report (the REMEDY-EPC late substudy), as also obtained in a different patient population and in another research center, within the same overall REMEDY study.

Because of the short time of the observation, no independent effects of any of the acute treatment administered could be demonstrated. We did not measure changes in lipid parameters or CRP, clearly shown upon longer treatments [58], as such changes are not expected to occur so acutely. The occurrence of acute administration was however witnessed by the investigators involved, and we can reasonably exclude issues of non-compliance. We did not find any effect of treatments on indices of myocardial damage, suggesting at least no harm from such treatments. The main aim of this pilot study was to provide descriptive data that can be valuable in designing future trials

## Conclusions

Our data, the first obtained after randomization of patients to multiple types of lipid-lowering drugs and at different dosage, and assessing CEC and EPC levels and functional activity, argue for the absence of any mechanistic link between any otherwise observed clinical outcome (observed in other studies) and the effects of early statin therapy on EPCs/CACs in patients

with CAD. The absence of any increase in EPC levels and function, whatever the type and dosage of lipid-lowering agent used, appears to reinforce the concept that any beneficial effect of early therapy with lipid-lowering drugs on periprocedural myocardial injury at PCI would be concomitant—and therefore also possibly linked—with the lowering of LDL cholesterol levels, which would require a longer time course, rather than to pleiotropic effects, at least those due to the mobilization of EPCs. This is in line with our findings explaining the effects of statins on stroke largely as the result of LDL cholesterol lowering, in a separate analysis of lipid-lowering clinical trials [59, 60].

## Author Contributions

**Conceptualization:** RM RDC.

**Data curation:** RM FVR PL MP MM.

**Formal analysis:** RM LM RDC.

**Funding acquisition:** RDC.

**Investigation:** RM FVR PL MP MM.

**Methodology:** RM PL MM CB GC RDC.

**Resources:** RDC.

**Supervision:** RM MM CB GC RDC.

**Validation:** RM MM CB RDC.

**Writing – original draft:** RM MM CB GC RDC.

**Writing – review & editing:** RM MM CB GC RDC.

## References

1. Perin E, Dohmann H, Borojevic R, Silva S, Sousa A, Mesquita C, et al. Transendocardial, autologous bone marrow cell transplantation for severe, chronic ischemic heart failure. *Circulation*. 2009; 117:2294–302.
2. Kalka C, Masuda H, Takahashi T, Kalka-Moll WM, Silver M, Kearney M, et al. Transplantation of ex vivo expanded endothelial progenitor cells for therapeutic neovascularization. *Proc Natl Acad Sci U S A*. 2000; 97:3422–7. <https://doi.org/10.1073/pnas.070046397> PMID: 10725398
3. Schatteman GC, Hanlon HD, Jiao C, Dodds SG, Christy BA. Blood-derived angioblasts accelerate blood-flow restoration in diabetic mice. *J Clin Invest*. 2000; 106:571–8. <https://doi.org/10.1172/JCI9087> PMID: 10953032
4. Lin Y, Weisdorf DJ, Solovey A, Hebbel RP. Origins of circulating endothelial cells and endothelial outgrowth from blood. *J Clin Invest*. 2000; 105:71–7. <https://doi.org/10.1172/JCI8071> PMID: 10619863
5. Asahara T, Murohara T, Sullivan A, Silver M, van der Zee R, Li T, et al. Isolation of putative progenitor endothelial cells for angiogenesis. *Science*. 1997; 275:964–7. PMID: 9020076
6. Kocher AA, Schuster MD, Szabolcs MJ, Takuma S, Burkoff D, Wang J, et al. Neovascularization of ischemic myocardium by human bone-marrow-derived angioblasts prevents cardiomyocyte apoptosis, reduces remodeling and improves cardiac function. *Nat Med*. 2001; 7:430–6. <https://doi.org/10.1038/86498> PMID: 11283669
7. Kawamoto A, Gwon HC, Iwaguro H, Yamaguchi JI, Uchida S, Masuda H, et al. Therapeutic potential of ex vivo expanded endothelial progenitor cells for myocardial ischemia. *Circulation*. 2001; 103:634–7. PMID: 11156872
8. Werner N, Kosiol S, Schiegl T, Ahlers P, Walenta K, Link A, et al. Circulating endothelial progenitor cells and cardiovascular outcomes. *The New England journal of medicine*. 2005; 353:999–1007. <https://doi.org/10.1056/NEJMoa043814> PMID: 16148285

9. Urbich C, Aicher A, Heeschen C, Dernbach E, Hofmann WK, Zeiher AM, et al. Soluble factors released by endothelial progenitor cells promote migration of endothelial cells and cardiac resident progenitor cells. *J Mol Cell Cardiol.* 2005; 39:733–42. <https://doi.org/10.1016/j.yjmcc.2005.07.003> PMID: 16199052
10. Powell TM, Paul JD, Hill JM, Thompson M, Benjamin M, Rodrigo M, et al. Granulocyte colony-stimulating factor mobilizes functional endothelial progenitor cells in patients with coronary artery disease. *Arterioscler Thromb Vasc Biol.* 2005; 25:296–301. <https://doi.org/10.1161/01.ATV.0000151690.43777.e4> PMID: 15569821
11. Vasa M, Fichtlscherer S, Adler K, Aicher A, Martin H, Zeiher AM, et al. Increase in circulating endothelial progenitor cells by statin therapy in patients with stable coronary artery disease. *Circulation.* 2001; 103:2885–90. PMID: 11413075
12. Landmesser U, Bahlmann F, Mueller M, Spiekermann S, Kirchhoff N, Schulz S, et al. Simvastatin versus ezetimibe: pleiotropic and lipid-lowering effects on endothelial function in humans. *Circulation.* 2005; 111:2356–63. <https://doi.org/10.1161/01.CIR.0000164260.82417.3F> PMID: 15867181
13. Dimmeler S, Aicher A, Vasa M, Mildner-Rihm C, Adler K, Tiemann M, et al. HMG-CoA reductase inhibitors (statins) increase endothelial progenitor cells via the PI 3-kinase/Akt pathway. *J Clin Invest.* 2001; 108:391–7. <https://doi.org/10.1172/JCI13152> PMID: 11489932
14. Assmus B, Urbich C, Aicher A, Hofmann WK, Haendeler J, Rossig L, et al. HMG-CoA reductase inhibitors reduce senescence and increase proliferation of endothelial progenitor cells via regulation of cell cycle regulatory genes. *Circ Res.* 2003; 92:1049–55. <https://doi.org/10.1161/01.RES.0000070067.64040.7C> PMID: 12676819
15. Madonna R, Di Napoli P, Massaro M, Grilli A, Felaco M, De Caterina A, et al. Simvastatin attenuates expression of cytokine-inducible nitric-oxide synthase in embryonic cardiac myoblasts. *J Biol Chem.* 2005; 280:13503–11. <https://doi.org/10.1074/jbc.M411859200> PMID: 15705589
16. Yang YJ, Qian HY, Huang J, Geng YJ, Gao RL, Dou KF, et al. Atorvastatin treatment improves survival and effects of implanted mesenchymal stem cells in post-infarct swine hearts. *European heart journal.* 2008; 29:1578–90. <https://doi.org/10.1093/eurheartj/ehn167> PMID: 18456710
17. Xu J, Liu X, Chen J, Zacharek A, Cui X, Savant-Bhonsale S, et al. Simvastatin enhances bone marrow stromal cell differentiation into endothelial cells via notch signaling pathway. *Am J Physiol Cell Physiol.* 2009; 296:C535–43. <https://doi.org/10.1152/ajpcell.00310.2008> PMID: 19109527
18. Ellis SG, Chew D, Chan A, Whitlow PL, Schneider JP, Topol EJ. Death following creatine kinase-MB elevation after coronary intervention: identification of an early risk period: importance of creatine kinase-MB level, completeness of revascularization, ventricular function, and probable benefit of statin therapy. *Circulation.* 2002; 106:1205–10. PMID: 12208794
19. Chan AW, Bhatt DL, Chew DP, Reginelli J, Schneider JP, Topol EJ, et al. Relation of inflammation and benefit of statins after percutaneous coronary interventions. *Circulation.* 2003; 107:1750–6. <https://doi.org/10.1161/01.CIR.0000060541.18923.E9> PMID: 12665489
20. Di Sciascio G, Patti G, Pasceri V, Gasparone A, Colonna G, Montinaro A. Efficacy of atorvastatin reload in patients on chronic statin therapy undergoing percutaneous coronary intervention: results of the ARMYDA-RECAPTURE (Atorvastatin for Reduction of Myocardial Damage During Angioplasty) Randomized Trial. *J Am Coll Cardiol.* 2009; 54:558–65. <https://doi.org/10.1016/j.jacc.2009.05.028> PMID: 19643320
21. Gibson CM, Pride YB, Hochberg CP, Sloan S, Sabatine MS, Cannon CP, et al. Effect of intensive statin therapy on clinical outcomes among patients undergoing percutaneous coronary intervention for acute coronary syndrome. PCI-PROVE IT: A PROVE IT-TIMI 22 (Pravastatin or Atorvastatin Evaluation and Infection Therapy-Thrombolysis In Myocardial Infarction 22) Substudy. *J Am Coll Cardiol.* 2009; 54:2290–5. <https://doi.org/10.1016/j.jacc.2009.09.010> PMID: 19958964
22. Nusca A, Melfi R, Patti G, Sciascio GD. Statin loading before percutaneous coronary intervention: proposed mechanisms and applications. *Future Cardiol.* 2010; 6:579–89. <https://doi.org/10.2217/fca.10.77> PMID: 20932108
23. Briguori C, Madonna R, Zimarino Z, Calabrò P, Quintavalle C, Salomone M, et al. Rosuvastatin for reduction of myocardial damage during coronary angioplasty—The REMEDY trial Cardiovascular Drug and Therapy. 2016;in press.
24. Thygesen K, Alpert JS, White HD, Jaffe AS, Apple FS, Galvani M, et al. Universal definition of myocardial infarction. *Circulation.* 2007; 116:2634–53. <https://doi.org/10.1161/CIRCULATIONAHA.107.187397> PMID: 17951284
25. Pasceri V, Patti G, Nusca A, Pristipino C, Richichi G, Di Sciascio G. Randomized trial of atorvastatin for reduction of myocardial damage during coronary intervention: results from the ARMYDA (Atorvastatin for Reduction of MYocardial Damage during Angioplasty) study. *Circulation.* 2004; 110:674–8. <https://doi.org/10.1161/01.CIR.0000137828.06205.87> PMID: 15277322



26. Patti G, Chello M, Pasceri V, Colonna D, Nusca A, Miglionico M, et al. Protection from procedural myocardial injury by atorvastatin is associated with lower levels of adhesion molecules after percutaneous coronary intervention: results from the ARMYDA-CAMs (Atorvastatin for Reduction of MYocardial Damage during Angioplasty-Cell Adhesion Molecules) substudy. *J Am Coll Cardiol.* 2006; 48:1560–6. <https://doi.org/10.1016/j.jacc.2006.06.061> PMID: 17045888
27. Patti G, Pasceri V, Colonna G, Miglionico M, Fischetti D, Sardella G, et al. Atorvastatin pretreatment improves outcomes in patients with acute coronary syndromes undergoing early percutaneous coronary intervention: results of the ARMYDA-ACS randomized trial. *J Am Coll Cardiol.* 2007; 49:1272–8. <https://doi.org/10.1016/j.jacc.2007.02.025> PMID: 17394957
28. Hill JM, Zalos G, Halcox JP, Schenke WH, Waclawiw MA, Quyyumi AA, et al. Circulating endothelial progenitor cells, vascular function, and cardiovascular risk. *The New England journal of medicine.* 2003; 348:593–600. <https://doi.org/10.1056/NEJMoa022287> PMID: 12584367
29. Ricottini E, Madonna R, Grieco D, Zoccoli A, Stampachiacchiere B, Patti G, et al. Effect of High-Dose Atorvastatin Reload on the Release of Endothelial Progenitor Cells in Patients on Long-Term Statin Treatment Who Underwent Percutaneous Coronary Intervention (from the ARMYDA-EPC Study). *The American journal of cardiology.* 2016; 117:165–71. <https://doi.org/10.1016/j.amjcard.2015.10.043> PMID: 26743348
30. Ingram DA, Mead LE, Tanaka H, Meade V, Fenoglio A, Mortell K, et al. Identification of a novel hierarchy of endothelial progenitor cells using human peripheral and umbilical cord blood. *Blood.* 2004; 104:2752–60. <https://doi.org/10.1182/blood-2004-04-1396> PMID: 15226175
31. Lanuti P, Rotta G, Almic C, Avvisati G, Budillon A, Doretto P, et al. Endothelial progenitor cells, defined by the simultaneous surface expression of VEGFR2 and CD133, are not detectable in healthy peripheral and cord blood. *Cytometry A.* 2015.
32. Orru V, Steri M, Sole G, Sidore C, Viridis F, Dei M, et al. Genetic variants regulating immune cell levels in health and disease. *Cell.* 2013; 155:242–56. <https://doi.org/10.1016/j.cell.2013.08.041> PMID: 24074872
33. Lachmann R, Lanuti P, Miscia S. OMIP-011: Characterization of circulating endothelial cells (CECs) in peripheral blood. *Cytometry A.* 2012; 81:549–51. <https://doi.org/10.1002/cyto.a.22071> PMID: 22648996
34. Lanuti P, Santilli F, Marchisio M, Pierdomenico L, Vitacolonna E, Santavenere E, et al. A novel flow cytometric approach to distinguish circulating endothelial cells from endothelial microparticles: relevance for the evaluation of endothelial dysfunction. *J Immunol Methods.* 2012; 380:16–22. <https://doi.org/10.1016/j.jim.2012.03.007> PMID: 22484509
35. Wang N, Qian P, Yan TD, Phan K. Periprocedural effects of statins on the incidence of contrast-induced acute kidney injury: A systematic review and trial sequential analysis. *Int J Cardiol.* 2016; 206:143–52. <https://doi.org/10.1016/j.ijcard.2016.01.004> PMID: 26797158
36. Padfield GJ, Newby DE, Mills NL. Understanding the role of endothelial progenitor cells in percutaneous coronary intervention. *J Am Coll Cardiol.* 2010; 55:1553–65. <https://doi.org/10.1016/j.jacc.2009.10.070> PMID: 20378071
37. Madonna R, De Caterina R. Circulating endothelial progenitor cells: Do they live up to their name? *Vascul Pharmacol.* 2015;67–69:2–5. <https://doi.org/10.1016/j.vph.2015.02.018> PMID: 25869520
38. Vasa M, Fichtlscherer S, Aicher A, Adler K, Urbich C, Martin H, et al. Number and migratory activity of circulating endothelial progenitor cells inversely correlate with risk factors for coronary artery disease. *Circ Res.* 2001; 89:E1–7. PMID: 11440984
39. Madonna R, Van Laake LW, Davidson SM, Engel FB, Hausenloy DJ, Lecour S, et al. Position Paper of the European Society of Cardiology Working Group Cellular Biology of the Heart: cell-based therapies for myocardial repair and regeneration in ischemic heart disease and heart failure. *European heart journal.* 2016.
40. Mancuso P, Antoniotti P, Quarna J, Calleri A, Rabascio C, Tacchetti C, et al. Validation of a standardized method for enumerating circulating endothelial cells and progenitors: flow cytometry and molecular and ultrastructural analyses. *Clin Cancer Res.* 2009; 15:267–73. <https://doi.org/10.1158/1078-0432.CCR-08-0432> PMID: 19118054
41. Kraan J, Strijbos MH, Sieuwerts AM, Foekens JA, den Bakker MA, Verhoef C, et al. A new approach for rapid and reliable enumeration of circulating endothelial cells in patients. *J Thromb Haemost.* 2012; 10:931–9. <https://doi.org/10.1111/j.1538-7836.2012.04681.x> PMID: 22385979
42. Woywodt A, Schroeder M, Mengel M, Schwarz A, Gwinner W, Haller H, et al. Circulating endothelial cells are a novel marker of cyclosporine-induced endothelial damage. *Hypertension.* 2003; 41:720–3. <https://doi.org/10.1161/01.HYP.0000052948.64125.AB> PMID: 12623986
43. Chong AY, Blann AD, Patel J, Freestone B, Hughes E, Lip GY. Endothelial dysfunction and damage in congestive heart failure: relation of flow-mediated dilation to circulating endothelial cells, plasma

- indexes of endothelial damage, and brain natriuretic peptide. *Circulation*. 2004; 110:1794–8. <https://doi.org/10.1161/01.CIR.0000143073.60937.50> PMID: 15364797
44. Del Papa N, Cortiana M, Vitali C, Silvestris I, Maglione W, Comina DP, et al. Simvastatin reduces endothelial activation and damage but is partially ineffective in inducing endothelial repair in systemic sclerosis. *J Rheumatol*. 2008; 35:1323–8. PMID: 18528965
  45. Farace F, Massard C, Borghi E, Bidart JM, Soria JC. Vascular disrupting therapy-induced mobilization of circulating endothelial progenitor cells. *Ann Oncol*. 2007; 18:1421–2. <https://doi.org/10.1093/annonc/mdm367> PMID: 17693656
  46. Fadini GP, Pucci L, Vanacore R, Baesso I, Penno G, Balbarini A, et al. Glucose tolerance is negatively associated with circulating progenitor cell levels. *Diabetologia*. 2007; 50:2156–63. <https://doi.org/10.1007/s00125-007-0732-y> PMID: 17579827
  47. Almic C, Skert C, Verardi R, Di Palma A, Bianchetti A, Neva A, et al. Changes in circulating endothelial cells count could become a valuable tool in the diagnostic definition of acute graft-versus-host disease. *Transplantation*. 2014; 98:706–12. <https://doi.org/10.1097/TP.0000000000000385> PMID: 25119132
  48. Fadini GP, Pagano C, Baesso I, Kotsafti O, Doro D, de Kreutzenberg SV, et al. Reduced endothelial progenitor cells and brachial artery flow-mediated dilation as evidence of endothelial dysfunction in ocular hypertension and primary open-angle glaucoma. *Acta Ophthalmol*. 2010; 88:135–41. <https://doi.org/10.1111/j.1755-3768.2009.01573.x> PMID: 19549102
  49. Bergheanu SC, Reijmers T, Zwinderman AH, Bobeldijk I, Ramaker R, Liem AH, et al. Lipidomic approach to evaluate rosuvastatin and atorvastatin at various dosages: investigating differential effects among statins. *Curr Med Res Opin*. 2008; 24:2477–87. <https://doi.org/10.1185/03007990802321709> PMID: 18655752
  50. Cannon CP, Blazing MA, Giugliano RP, McCagg A, White JA, Theroux P, et al. Ezetimibe Added to Statin Therapy after Acute Coronary Syndromes. *The New England journal of medicine*. 2015; 372:2387–97. <https://doi.org/10.1056/NEJMoa1410489> PMID: 26039521
  51. Watanabe E, Yamaguchi J, Arashi H, Ogawa H, Hagiwara N. Effects of Statin versus the Combination of Ezetimibe plus Statin on Serum Lipid Absorption Markers in Patients with Acute Coronary Syndrome. *J Lipids*. 2015; 2015:109158. <https://doi.org/10.1155/2015/109158> PMID: 25815213
  52. Huang B, Cheng Y, Xie Q, Lin G, Wu Y, Feng Y, et al. Effect of 40 mg versus 10 mg of atorvastatin on oxidized low-density lipoprotein, high-sensitivity C-reactive protein, circulating endothelial-derived microparticles, and endothelial progenitor cells in patients with ischemic cardiomyopathy. *Clin Cardiol*. 2012; 35:125–30. <https://doi.org/10.1002/clc.21017> PMID: 22271072
  53. Hristov M, Fach C, Becker C, Heussen N, Liehn EA, Blindt R, et al. Reduced numbers of circulating endothelial progenitor cells in patients with coronary artery disease associated with long-term statin treatment. *Atherosclerosis*. 2007; 192:413–20. <https://doi.org/10.1016/j.atherosclerosis.2006.05.031> PMID: 16837000
  54. Deschaseaux F, Selmani Z, Falcoz PE, Mersin N, Meneveau N, Penfornis A, et al. Two types of circulating endothelial progenitor cells in patients receiving long term therapy by HMG-CoA reductase inhibitors. *Eur J Pharmacol*. 2007; 562:111–8. <https://doi.org/10.1016/j.ejphar.2007.01.045> PMID: 17320859
  55. Park A, Barrera-Ramirez J, Ranasinghe I, Pilon S, Sy R, Fergusson D, et al. Use of Statins to Augment Progenitor Cell Function in Preclinical and Clinical Studies of Regenerative Therapy: a Systematic Review. *Stem Cell Rev*. 2016; 12:327–39. <https://doi.org/10.1007/s12015-016-9647-7> PMID: 26873165
  56. Baran C, Durdu S, Dalva K, Zaim C, Dogan A, Ocakoglu G, et al. Effects of preoperative short term use of atorvastatin on endothelial progenitor cells after coronary surgery: a randomized, controlled trial. *Stem Cell Rev*. 2012; 8:963–71. <https://doi.org/10.1007/s12015-011-9321-z> PMID: 22076751
  57. Kim JW, Yun KH, Kim EK, Kim YC, Joe DY, Ko JS, et al. Effect of High Dose Rosuvastatin Loading before Primary Percutaneous Coronary Intervention on Infarct Size in Patients with ST-Segment Elevation Myocardial Infarction. *Korean Circ J*. 2014; 44:76–81. <https://doi.org/10.4070/kcj.2014.44.2.76> PMID: 24653736
  58. Ridker PM, Danielson E, Fonseca FA, Genest J, Gotto AM Jr., Kastelein JJ, et al. Rosuvastatin to prevent vascular events in men and women with elevated C-reactive protein. *The New England journal of medicine*. 2008; 359:2195–207. <https://doi.org/10.1056/NEJMoa0807646> PMID: 18997196
  59. De Caterina R, Scarano M, Marfisi R, Lucisano G, Palma F, Tataschiere A, et al. Cholesterol-lowering interventions and stroke: insights from a meta-analysis of randomized controlled trials. *J Am Coll Cardiol*. 2010; 55:198–211. <https://doi.org/10.1016/j.jacc.2009.07.062> PMID: 20117400
  60. De Caterina R, Salvatore T, Marchioli R. Cholesterol-lowering interventions and stroke: Insights from IMPROVE-IT. *Atherosclerosis*. 2016; 248:216–8. <https://doi.org/10.1016/j.atherosclerosis.2016.03.024> PMID: 27035113
